# Supplementary material for: Biosynthesis of α-bisabolene from low-cost renewable feedstocks by peroxisome engineering and systems metabolic engineering of the yeast Yarrowia lipolytica
Source: Royal Society of Chemistry journal article supplement (doi:10.1039/d3gc01936e), 2023-01-01
Supplement: d3gc01936e1.pdf [file d3gc01936e1.pdf]

## Electronic Supplementary Information

# Biosynthesis of $\alpha$ -bisabolene from low-cost renewable feedstocks by peroxisome engineering and systems metabolic engineering of the yeast *Yarrowia lipolytica*

Baixiang Zhao<sup>a</sup>, Yahui Zhang<sup>a</sup>, Yaping Wang<sup>a</sup>, Zhihui Lu<sup>a</sup>, Lin Miao<sup>a</sup>, Shuhui Wang<sup>a</sup>, Zhuo Li<sup>a</sup>, Xu Sun<sup>a</sup>, Yuqing Han<sup>a</sup>, Sicheng He<sup>a</sup>, Ziyuan Zhang<sup>a</sup>, Dongguang Xiao<sup>a</sup>, Cuiying Zhang<sup>a\*\*</sup>, Jee Loon Foo<sup>b, c, d\*\*</sup>, Adison Wong<sup>e\*\*</sup>, Aiqun Yu<sup>a\*</sup>

<sup>a</sup>State Key Laboratory of Food Nutrition and Safety, Key Laboratory of Industrial Fermentation Microbiology of the Ministry of Education, Tianjin Key Laboratory of Industrial Microbiology, College of Biotechnology, Tianjin University of Science and Technology, No.29 the 13th Street TEDA, Tianjin 300457, PR China

<sup>b</sup>Synthetic Biology Translational Research Programme, Yong Loo Lin School of Medicine, National University of Singapore, Singapore 119228, Singapore

<sup>c</sup>NUS Synthetic Biology for Clinical and Technological Innovation (SynCTI), National University of Singapore, Singapore 117456, Singapore

<sup>d</sup>Department of Biochemistry, Yong Loo Lin School of Medicine, National University of Singapore, Singapore 117597, Singapore

<sup>e</sup>Food, Chemical and Biotechnology Cluster, Singapore Institute of Technology, Singapore 138683, Singapore

\*\*Co-corresponding author: Dr. Cui-ying Zhang, [Professor], [Tianjin University of Science and Technology], E-mail: [Cyzhangcy@tust.edu.cn](mailto:Cyzhangcy@tust.edu.cn), Tel: +86 22 60602007

\*\*Co-corresponding author: Dr. Jee Loon Foo, [Research Assistant Professor], [National University of Singapore], E-mail: [jeeloon.foo@nus.edu.sg](mailto:jeeloon.foo@nus.edu.sg), Tel: +65 66012449

\*\*Co-corresponding author: Dr. Adison Wong, [Assistant Professor], [Singapore Institute of Technology], E-mail: [adison.wong@singaporetech.edu.sg](mailto:adison.wong@singaporetech.edu.sg), Tel: +65 65921626

\*Corresponding author: Dr. Aiqun Yu, [Professor], [Tianjin University of Science and Technology], E-mail: [yuaiqun@tust.edu.cn](mailto:yuaiqun@tust.edu.cn), Tel: +86 22 60602723

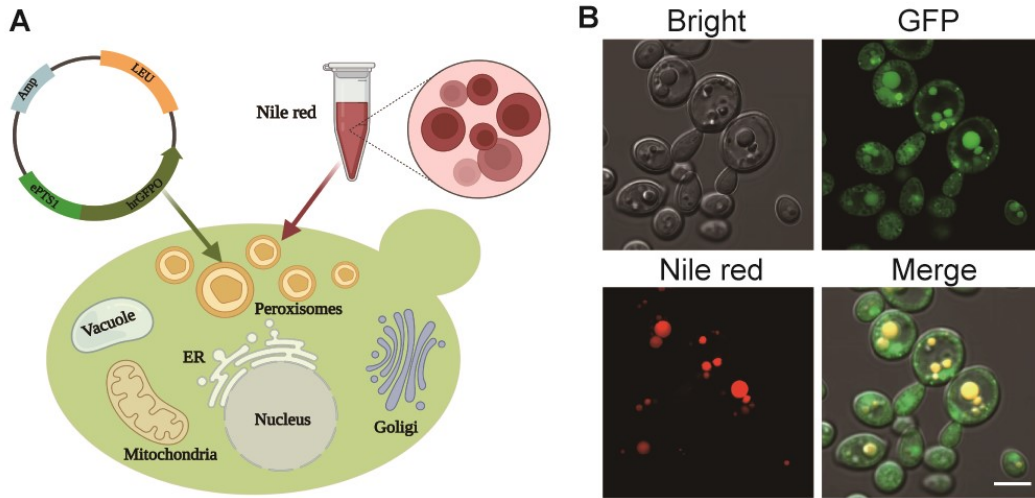

**Fig. S1** Visualizing the location of peroxisomes.

(A) GFP-ePTS1 is used to indicate the location of peroxisomes in *Y. lipolytica*. Nile red is used to stain intracellular lipids, including those in peroxisomes.

(B) LSCM visualization of peroxisomes using Nile red and GFP-ePTS1. A single focal plane is shown for all micrographs. The scale bar is 5  $\mu$ m.

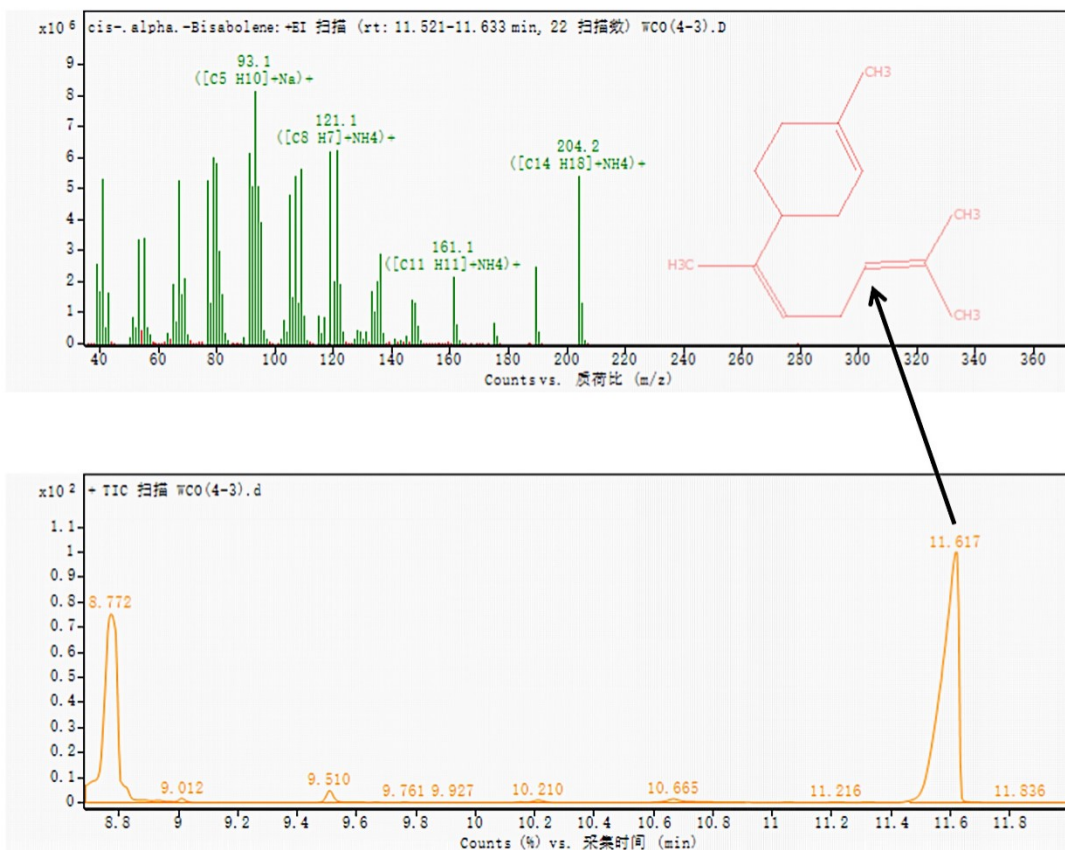

**Fig. S2** A representative GC-MS profile of solvent overlay-extracted  $\alpha$ -bisabolene from a culture of engineered *Y. lipolytica* strains.

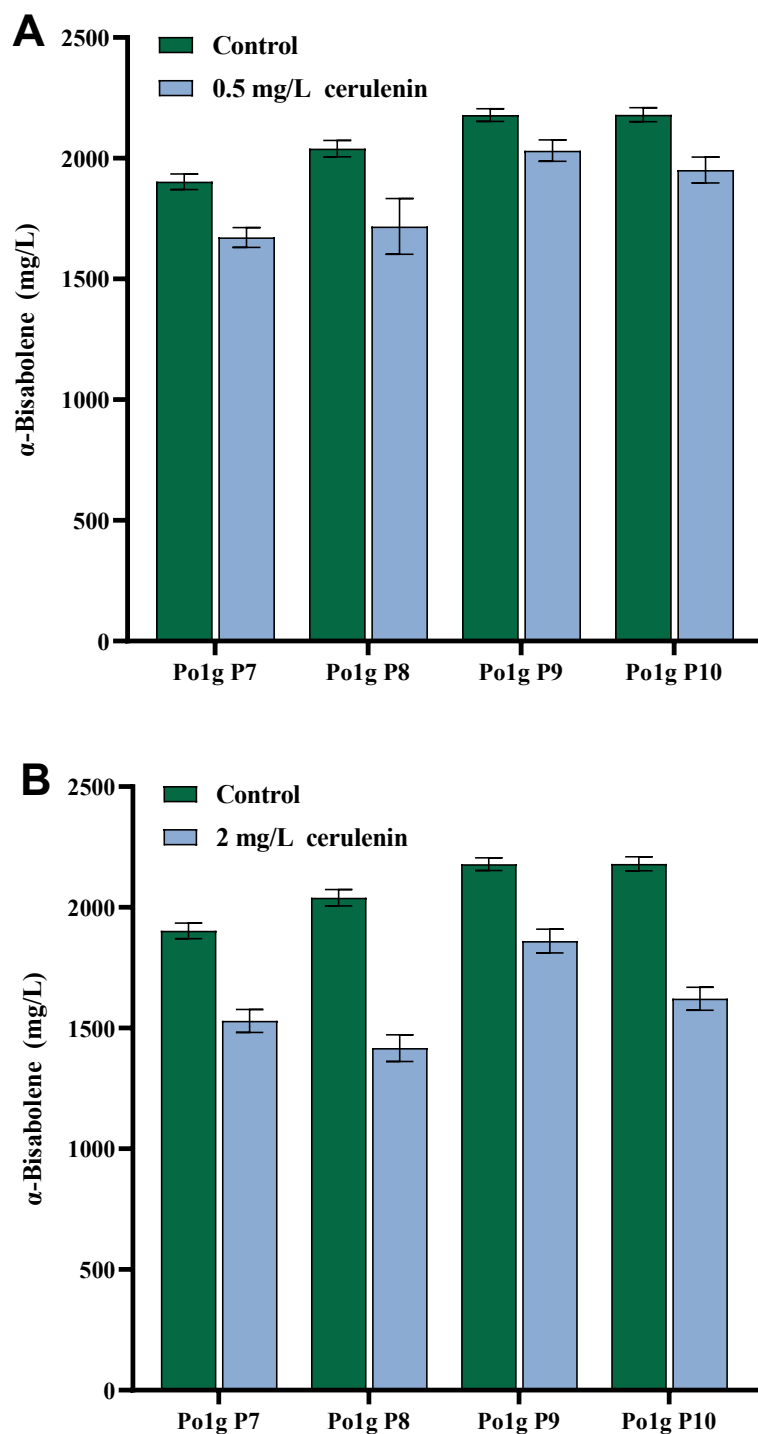

**Fig. S3** Effects of addition of cerulenin on titers of  $\alpha$ -bisabolene.

(A) Effect of 0.5 mg/L cerulenin on  $\alpha$ -bisabolene production carried out for Po1g P7, Po1g P8, Po1g P9 and Po1g P10 strains compared to the same strains without supplementation of cerulenin (control).

(B) Effect of 2 mg/L cerulenin on  $\alpha$ -bisabolene production carried out for Po1g P7, Po1g P8, Po1g P9 and Po1g P10 strains compared to the same strains without supplementation of cerulenin (control).

|           |                                                                                                                               |     |
|-----------|-------------------------------------------------------------------------------------------------------------------------------|-----|
| YIPex23p  | MSD.....K EKKKSSATHAAFPPSTASQPOS.....MSP                                                                                      | 31  |
| Ylr324p   | MSG.NTTNVHETRAKFAETLQPRI GGNTTKVI RAALEKNEAESGVSEDNDNGSLEKVNVA                                                                | 64  |
| Ygr004p   | MSEI.NNENLEPTSSSTVAESTE.....SKNKHI R S ALRKRKGLS AOTYEE.....DQEAI                                                             | 56  |
| Ybr168p   | .....MDTNSKTKVQTENKKI KAKFI HN.....HGQKPS                                                                                     | 31  |
| Consensus | .....I                                                                                                                        |     |
| YIPex23p  | SSTPTPTVTKALAOAYFYI LASDKVLGLLTVTEDDQWOSFLLVAVYVTVVMYYEYLV                                                                    | 96  |
| Ylr324p   | TSPTPTI SKALVKLYFYLI LI DEF LNVTWTGKNI MSSVLMCLFI TTVEYFETLVKYF                                                               | 129 |
| Ygr004p   | TSPTPTKTVSRSLVRLYFYLI VVDNFI S I TWSNDNVSANLLGI FLFTVCVLYFGFI                                                                 | 121 |
| Ybr168p   | QIPTPTM SSTIFHAYPLLLI FDNALANI MWSDDKCLTFI YLTSI WLTISFFI PV                                                                  | 96  |
| Consensus | .....t p l y p d l w h                                                                                                        |     |
| YIPex23p  | G.....FI WAFVYI RQSVERROTSEP SLDALVHTLTNVTTKANLLLLPI TSLSL                                                                    | 145 |
| Ylr324p   | A.....ILWGYSLLDNYI EGTLS SPTLEDI ALLMNRVSLKSDI LLSPMVNLG                                                                      | 177 |
| Ygr004p   | G.....I I WVYLLI DKHVQETNASCP SLDI I HVMDRVSMKSSAVLSPI TI LS                                                                  | 169 |
| Ybr168p   | TKI LRLWLG I S GSAFLF L S F M Y I V S L I A S L R D T E P P T L D E I V V L L E S V L D K L E V L R N E L N V W K K           | 161 |
| Consensus | .....p l i v k                                                                                                                |     |
| YIPex23p  | TPRDVT.....RLAFTTLFLSPLLYMFGAYFFLGRKFLTTGVFFITVYHMAARVTRAVI                                                                   | 201 |
| Ylr324p   | .TODIQ.....RLLYTTVI LSP I YVM T W L L L P P R S L M L M V G M F L L T Y H S P M S K V A R R L L W                             | 232 |
| Ygr004p   | .AQDVR.....RLLFIT I AFLSPVYI FLT V F V L S P N Y L M L I G G L Y V I T Y H S K L I R R M R R Y L W                            | 224 |
| Ybr168p   | LKLSFDGVNKECSGKRLFCRLFLFGTI F Q I V I M R Y I S P G T Y T R F F I I T G L I Y N T S S F Q A T L R L L W                       | 226 |
| Consensus | .....r l p l i y w                                                                                                            |     |
| YIPex23p  | KSKAIRLVTFYLTGLDFSNTRNLGAF GFTOSPLSVQS.....KDGKPVRF TYVLYENORR                                                                | 257 |
| Ylr324p   | KFKI RLLLVFYVTCLDLGGI NKDOGI F ATVOKQVKKLASTENS NGVLSDSKPI RF TYVLYENORR                                                      | 297 |
| Ygr004p   | KFRV RLLLVFYI TGLDLGGP DNNRRL FASVNKKI RSFVWNEVGN. TSNTKKT VLFKVALFENORR                                                      | 288 |
| Ybr168p   | RFTAVR...NFYYLGI E S F K I S S F L P K H L K M E Q I I P L S Q . G R A I T V P L V E V L P K L R D K K G D D H I H            | 288 |
| Consensus | .....r f g                                                                                                                    |     |
| YIPex23p  | WGI GWTANLLAYERTP WDEF LNEVTPPSEFKLPDTEGTGMKWVWDP TWRLDCTN. DCAI VI I                                                         | 321 |
| Ylr324p   | WGI GWKPSMLS YERTP WDEF LNEAPSPENFHLPE. ETNTMVMRWVDKT WR L D M N . D C A I Q V P                                              | 360 |
| Ygr004p   | WGI GWTSTMLS YERAS WDEF LNTSPSEVFTLPE. EOSGM AEW H D K D W L D L T N . D C I I Q L P                                          | 351 |
| Ybr168p   | I L Q L L N E Q K D N F G N E D L K I L E I E V Y E N Q R R W Y Q N K . N W S T K L P Y E R Q N Y C I E I K N T D C T L T M R | 352 |
| Consensus | .....I n d g                                                                                                                  |     |
| YIPex23p  | GNKALSTP. DPSPSEGWY YDNTWKRPTADDSFSKYTRRRRWRTAELI TVTKPTDVVVTVEED.                                                            | 384 |
| Ylr324p   | NSKARTSA. DPSPDEGFI YDNTWKKP SKEDSFSKYTRRRRWRTAELVKTSDFDDES VI NSNRNS                                                         | 424 |
| Ygr004p   | ASAAKTKV. KP GADEGFI YDNTWNNP SATDTYKKYTRRRRW RTATVTTTYDDEPTVEKATPN.                                                          | 414 |
| Ybr168p   | SCLPPDGLGEEELPNNWHWI NDNWDGTDWI YSDSAWKEI GOYSSLESFTRSRKWKRL FHL....                                                          | 413 |
| Consensus | .....w                                                                                                                        |     |
| YIPex23p  | .....GVTDAAG...DVEI I TTETEEK                                                                                                 | 403 |
| Ylr324p   | AI EOKVEENS TNGL TAEQELGS NKOEKDNAKVGEP TTEETKEF AEASNI NEGEFERI SSTDEEV                                                      | 489 |
| Ygr004p   | SHALKSEEN.....NRVRK...RKV.....SFSTAN.....EVHI I PSSDSSK                                                                       | 449 |
| Ybr168p   | .....                                                                                                                         | 413 |
| Consensus | .....                                                                                                                         |     |
| YIPex23p  | VRRRKGI RFEEDS.....                                                                                                           | 416 |
| Ylr324p   | LKSRARDRLAKVLDDTEEKEQSNPTI GRDSKKA                                                                                            | 522 |
| Ygr004p   | LI QI SDVSMSPSL.....                                                                                                          | 462 |
| Ybr168p   | .....                                                                                                                         | 413 |
| Consensus | .....                                                                                                                         |     |

**Fig. S4** Sequence alignment of *Y. lipolytica* YIPex23p with the proteins Ylr324p, Ygr004p, and Ybr168p encoded by the *S. cerevisiae* genome. Amino acid sequences were aligned with the use of the DNAMAN program. Identical residues in four proteins are shaded black, whereas identical residues in at least three of the proteins are shaded pink, whereas identical residues in two proteins are shaded blue. Similarity rules: G = A = S; A = V; V = I = L = M; I = L = M = F = Y W; K = R = H; D = E = Q = N; and S = T = Q = N.

**Table S1** Strains used in this study.

| Strains            | Genotype                                                                                                                                                                                                                                     | Reference  |
|--------------------|----------------------------------------------------------------------------------------------------------------------------------------------------------------------------------------------------------------------------------------------|------------|
| Po1g <i>KU70</i> Δ | <i>MATA, xpr2-332, leu2-270, ku70<sup>-</sup>, ura3-302::URA3, Axp-2</i>                                                                                                                                                                     | 30         |
| Po1g-GFP-ePTS1     | Po1g <i>KU70</i> Δ, <i>GFP-ePTS1</i>                                                                                                                                                                                                         | This study |
| Po1g KaBS          | Po1g <i>KU70</i> Δ, <i>α-Bis</i>                                                                                                                                                                                                             | 4          |
| Po1g P1            | Po1g <i>KU70</i> Δ, <i>Erg10-ePTS1, Erg13-ePTS1, HMGR-ePTS1, Erg12-ePTS1, IDI-ePTS1, Erg8-ePTS1, Erg19-ePTS1, Erg20-ePTS1, α-Bis-ePTS1</i>                                                                                                   | This study |
| Po1g P2            | Po1g P1, <i>ABC-G1</i>                                                                                                                                                                                                                       | This study |
| Po1g P3            | Po1g P1, <i>ABC-G1-ePTS1</i>                                                                                                                                                                                                                 | This study |
| Po1g P4            | Po1g P1, <i>ABC-G1, HMGR-ePTS1, α-Bis-ePTS1</i>                                                                                                                                                                                              | This study |
| Po1g P5            | Po1g P1, <i>ABC-G1-ePTS1, HMGR-ePTS1, α-Bis-ePTS1</i>                                                                                                                                                                                        | This study |
| Po1g P6            | <i>MATA, xpr2-332, leu2-270, ku70<sup>-</sup>, ura3-302::URA3, Axp-2, Erg10-ePTS1, Erg13-ePTS1, HMGR-ePTS1, Erg12-ePTS1, IDI-ePTS1, Erg8-ePTS1, Erg19-ePTS1, Erg20-ePTS1, α-Bis-ePTS1, ABC-G1-ePTS1, HMGR-ePTS1, α-Bis-ePTS1, POX2</i>       | This study |
| Po1g P7            | <i>MATA, xpr2-332, leu2-270, ku70<sup>-</sup>, ura3-302::URA3, Axp-2, Erg10-ePTS1, Erg13-ePTS1, HMGR-ePTS1, Erg12-ePTS1, IDI-ePTS1, Erg8-ePTS1, Erg19-ePTS1, Erg20-ePTS1, α-Bis-ePTS1, ABC-G1-ePTS1, HMGR-ePTS1, α-Bis-ePTS1, MFE1</i>       | This study |
| Po1g P8            | <i>MATA, xpr2-332, leu2-270, ku70<sup>-</sup>, ura3-302::URA3, Axp-2, Erg10-ePTS1, Erg13-ePTS1, HMGR-ePTS1, Erg12-ePTS1, IDI-ePTS1, Erg8-ePTS1, Erg19-ePTS1, Erg20-ePTS1, α-Bis-ePTS1, ABC-G1-ePTS1, HMGR-ePTS1, α-Bis-ePTS1, POT1</i>       | This study |
| Po1g P9            | <i>MATA, xpr2-332, leu2-270, ku70<sup>-</sup>, ura3-302::URA3, Axp-2, Erg10-ePTS1, Erg13-ePTS1, HMGR-ePTS1, Erg12-ePTS1, IDI-ePTS1, Erg8-ePTS1, Erg19-ePTS1, Erg20-ePTS1, α-Bis-ePTS1, ABC-G1-ePTS1, HMGR-ePTS1, α-Bis-ePTS1, MFE1, POT1</i> | This study |

|          |                                                                                                                                                                                                                                                              |            |
|----------|--------------------------------------------------------------------------------------------------------------------------------------------------------------------------------------------------------------------------------------------------------------|------------|
| Po1g P10 | <i>MATA, xpr2-332, leu2-270, ku70, ura3-302::URA3, Axp-2, Erg10-ePTS1, Erg13-ePTS1, HMGR-ePTS1, Erg12-ePTS1, IDI-ePTS1, Erg8-ePTS1, Erg19-ePTS1, Erg20-ePTS1, α-Bis-ePTS1, ABC-G1-ePTS1, HMGR-ePTS1, α-Bis-ePTS1, MFE1, POT1, POX2</i>                       | This study |
| Po1g P11 | <i>MATA, xpr2-332, leu2-270, ku70, ura3-302::URA3, Axp-2, Erg10-ePTS1, Erg13-ePTS1, HMGR-ePTS1, Erg12-ePTS1, IDI-ePTS1, Erg8-ePTS1, Erg19-ePTS1, Erg20-ePTS1, α-Bis-ePTS1, ABC-G1-ePTS1, HMGR-ePTS1, α-Bis-ePTS1, MFE1, POT1, ANT1</i>                       | This study |
| Po1g P12 | <i>MATA, xpr2-332, leu2-270, ku70, ura3-302::URA3, Axp-2, Erg10-ePTS1, Erg13-ePTS1, HMGR-ePTS1, Erg12-ePTS1, IDI-ePTS1, Erg8-ePTS1, Erg19-ePTS1, Erg20-ePTS1, α-Bis-ePTS1, ABC-G1-ePTS1, HMGR-ePTS1, α-Bis-ePTS1, MFE1, POT1, ANT1, ΔYIPex23p, GFP-ePTS1</i> | This study |

---

**Table S2** Plasmids used in this study.

| Plasmids                                | Features                                                                                                                                                                                                                       | Reference  |
|-----------------------------------------|--------------------------------------------------------------------------------------------------------------------------------------------------------------------------------------------------------------------------------|------------|
| pYLEX1(leu2)                            | <i>Y. lipolytica-integrative plasmid, P<sub>hp4d</sub>-T<sub>XPR2</sub>, leu2, Ap<sup>r</sup></i>                                                                                                                              | This study |
| pYLEX1-hyg                              | <i>pYLEX1 variant with the hyg marker</i>                                                                                                                                                                                      | This study |
| pYLEX1-nat                              | <i>pYLEX1 variant with the nat marker</i>                                                                                                                                                                                      | This study |
| pYLEX1-GFP-ePTS1                        | <i>P<sub>hp4d</sub>-GFP-ePTS1-T<sub>XPR2</sub>, leu2, Ap<sup>r</sup></i>                                                                                                                                                       | This study |
| pYLEX1- $\alpha$ -Bis                   | <i>P<sub>hp4d</sub>-<math>\alpha</math>-Bis-T<sub>XPR2</sub>, leu2, Ap<sup>r</sup></i>                                                                                                                                         | This study |
| pYLEX1- $\alpha$ -Bis- ePTS1            | <i>P<sub>hp4d</sub>-<math>\alpha</math>-Bis-ePTS1-T<sub>XPR2</sub>, leu2, Ap<sup>r</sup></i>                                                                                                                                   | This study |
| pYLEX1-Erg10-ePTS1                      | <i>P<sub>hp4d</sub>-Erg10-ePTS1-T<sub>XPR2</sub>, leu2, Ap<sup>r</sup></i>                                                                                                                                                     | This study |
| pYLEX1-Erg13-ePTS1                      | <i>P<sub>hp4d</sub>-Erg13-ePTS1-T<sub>XPR2</sub>, leu2, Ap<sup>r</sup></i>                                                                                                                                                     | This study |
| pYLEX1-HMGR-ePTS1                       | <i>P<sub>hp4d</sub>-HMGR-ePTS1-T<sub>XPR2</sub>, leu2, Ap<sup>r</sup></i>                                                                                                                                                      | This study |
| pYLEX1-Erg12-ePTS1                      | <i>P<sub>hp4d</sub>-Erg12-ePTS1-T<sub>XPR2</sub>, leu2, Ap<sup>r</sup></i>                                                                                                                                                     | This study |
| pYLEX1-Erg8-ePTS1                       | <i>P<sub>hp4d</sub>-Erg8-ePTS1-T<sub>XPR2</sub>, leu2, leu2, Ap<sup>r</sup></i>                                                                                                                                                | This study |
| pYLEX1-Erg19-ePTS1                      | <i>P<sub>hp4d</sub>-Erg19-ePTS1-T<sub>XPR2</sub>, leu2, Ap<sup>r</sup></i>                                                                                                                                                     | This study |
| pYLEX1-IDI-ePTS1                        | <i>P<sub>hp4d</sub>-IDI-ePTS1-T<sub>XPR2</sub>, leu2, Ap<sup>r</sup></i>                                                                                                                                                       | This study |
| pYLEX1-Erg20-ePTS1                      | <i>P<sub>hp4d</sub>-Erg20-ePTS1-T<sub>XPR2</sub>, leu2, Ap<sup>r</sup></i>                                                                                                                                                     | This study |
| pYLEX1-POX2                             | <i>P<sub>hp4d</sub>-POX2-T<sub>XPR2</sub>, leu2, Ap<sup>r</sup></i>                                                                                                                                                            | This study |
| pYLEX1-MFE1                             | <i>P<sub>hp4d</sub>-MFE1-T<sub>XPR2</sub>, leu2, Ap<sup>r</sup></i>                                                                                                                                                            | This study |
| pYLEX1-POT1                             | <i>P<sub>hp4d</sub>-POT1-T<sub>XPR2</sub>, leu2, Ap<sup>r</sup></i>                                                                                                                                                            | This study |
| pYLEX1-ANT1                             | <i>P<sub>hp4d</sub>-ANT1-T<sub>XPR2</sub>, leu2, Ap<sup>r</sup></i>                                                                                                                                                            | This study |
| pYLEX1-Erg10-Erg13-<br>ePTS1            | <i>P<sub>hp4d</sub>-Erg10-ePTS1-T<sub>XPR2</sub>, P<sub>hp4d</sub>-Erg13-ePTS1-T<sub>XPR2</sub>,<br/>leu2, Ap<sup>r</sup></i>                                                                                                  | This study |
| pYLEX1-Erg10-Erg13-<br>HMGR-ePTS1       | <i>P<sub>hp4d</sub>-Erg10-ePTS1-T<sub>XPR2</sub>, P<sub>hp4d</sub>-Erg13-ePTS1-T<sub>XPR2</sub>,<br/>P<sub>hp4d</sub>-HMGR-ePTS1-T<sub>XPR2</sub>, leu2, Ap<sup>r</sup></i>                                                    | This study |
| pYLEX1-Erg10-Erg13-<br>HMGR-Erg12-ePTS1 | <i>P<sub>hp4d</sub>-Erg10-ePTS1-T<sub>XPR2</sub>, P<sub>hp4d</sub>-Erg13-ePTS1-T<sub>XPR2</sub>,<br/>P<sub>hp4d</sub>-HMGR-ePTS1-T<sub>XPR2</sub>, P<sub>hp4d</sub>-Erg12-ePTS1-T<sub>XPR2</sub>,<br/>leu2, Ap<sup>r</sup></i> | This study |
| pYLEX1-Erg10-Erg13-                     | <i>P<sub>hp4d</sub>-Erg10-ePTS1-T<sub>XPR2</sub>, P<sub>hp4d</sub>-Erg13-ePTS1-T<sub>XPR2</sub>,<br/>P<sub>hp4d</sub>-HMGR-ePTS1-T<sub>XPR2</sub>, P<sub>hp4d</sub>-Erg12-ePTS1-T<sub>XPR2</sub>,</i>                          | This study |



|                                                                      |                                                                                                                                                                                                                                                                                                                 |            |
|----------------------------------------------------------------------|-----------------------------------------------------------------------------------------------------------------------------------------------------------------------------------------------------------------------------------------------------------------------------------------------------------------|------------|
| HMGR-Erg12-Erg8-ePTS1                                                | $P_{hp4d}\text{-Erg8-ePTS1-}T_{XPR2}, leu2, Ap^r$                                                                                                                                                                                                                                                               |            |
| pYLEX1-Erg10-Erg13-<br>HMGR-Erg12-Erg8-Erg19-<br>$\alpha$ -Bis-ePTS1 | $P_{hp4d}\text{-Erg10-ePTS1-}T_{XPR2}, P_{hp4d}\text{-Erg13-ePTS1-}T_{XPR2},$<br>$P_{hp4d}\text{-HMGR-ePTS1-}T_{XPR2}, P_{hp4d}\text{-Erg12-ePTS1-}T_{XPR2},$<br>$P_{hp4d}\text{-Erg8-ePTS1-}T_{XPR2}, P_{hp4d}\text{-Erg19-ePTS1-}T_{XPR2},$<br>$P_{hp4d}\text{-}\alpha\text{-Bis-ePTS1-}T_{XPR2}, leu2, Ap^r$ | This study |
| pYLEX1-hyg-IDI-ePTS1                                                 | $P_{hp4d}\text{-IDI-ePTS1-}T_{XPR2}, hyg, Ap^r$                                                                                                                                                                                                                                                                 | This study |
| pYLEX1-hyg-IDI-Erg20-<br>ePTS1                                       | $P_{hp4d}\text{-IDI-ePTS1-}T_{XPR2}, P_{hp4d}\text{-Erg20-ePTS1-}T_{XPR2}, hyg,$<br>$Ap^r$                                                                                                                                                                                                                      | This study |
| pYLEX1-hyg-IDI-Erg20-<br>ePTS1-ABC-G1                                | $P_{hp4d}\text{-IDI-ePTS1-}T_{XPR2}, P_{hp4d}\text{-Erg20-ePTS1-}T_{XPR2},$<br>$P_{hp4d}\text{-ABC-G1-TXPR2}, hyg, Ap^r$                                                                                                                                                                                        | This study |
| pYLEX1-hyg-IDI-Erg20-<br>ePTS1-ABC-G1-ePTS1                          | $P_{hp4d}\text{-IDI-ePTS1-}T_{XPR2}, P_{hp4d}\text{-Erg20-ePTS1-}T_{XPR2},$<br>$P_{hp4d}\text{-ABC-G1-ePTS1-}T_{XPR2}, hyg, Ap^r$                                                                                                                                                                               | This study |
| pYLEX1-hyg-IDI-Erg20-<br>HMGR- $\alpha$ -Bis-ePTS1-ABC-<br>G1        | $P_{hp4d}\text{-IDI-ePTS1-}T_{XPR2}, P_{hp4d}\text{-Erg20-ePTS1-}T_{XPR2},$<br>$P_{hp4d}\text{-HMGR-ePTS1-}T_{XPR2}, P_{hp4d}\text{-}\alpha\text{-Bis-ePTS1-}T_{XPR2},$<br>$P_{hp4d}\text{-ABC-G1-TXPR2}, hyg, Ap^r$                                                                                            | This study |
| pYLEX1-hyg-IDI-Erg20-<br>HMGR- $\alpha$ -Bis-ABC-G1-<br>ePTS1        | $P_{hp4d}\text{-IDI-ePTS1-}T_{XPR2}, P_{hp4d}\text{-Erg20-ePTS1-}T_{XPR2},$<br>$P_{hp4d}\text{-HMGR-ePTS1-}T_{XPR2}, P_{hp4d}\text{-}\alpha\text{-Bis-ePTS1-}T_{XPR2},$<br>$P_{hp4d}\text{-ABC-G1-ePTS1-}T_{XPR2}, hyg, Ap^r$                                                                                   | This study |
| pYLEX1-nat-POX2                                                      | $P_{hp4d}\text{-POX2-}T_{XPR2}, nat, Ap^r$                                                                                                                                                                                                                                                                      | This study |
| pYLEX1-nat-MFE1                                                      | $P_{hp4d}\text{-MFE1-}T_{XPR2}, nat, Ap^r$                                                                                                                                                                                                                                                                      | This study |
| pYLEX1-nat-POT1                                                      | $P_{hp4d}\text{-POT1-}T_{XPR2}, nat, Ap^r$                                                                                                                                                                                                                                                                      | This study |
| pYLEX1-nat-MFE1-POT1                                                 | $P_{hp4d}\text{-MFE1-}T_{XPR2}, P_{hp4d}\text{-POT1-}T_{XPR2}, nat, Ap^r$                                                                                                                                                                                                                                       | This study |
| pYLEX1-nat-MFE1-POT1-<br>POX2                                        | $P_{hp4d}\text{-MFE1-}T_{XPR2}, P_{hp4d}\text{-POT1-}T_{XPR2}, P_{hp4d}\text{-POX2-}$<br>$T_{XPR2}, nat, Ap^r$                                                                                                                                                                                                  | This study |
| pYLEX1-nat-MFE1-POT1-<br>ANT1                                        | $P_{hp4d}\text{-MFE1-}T_{XPR2}, P_{hp4d}\text{-POT1-}T_{XPR2}, P_{hp4d}\text{-ANT1-}$<br>$T_{XPR2}, nat, Ap^r$                                                                                                                                                                                                  | This study |

**Table S3** Primers used in PCR.

| Applications                                                                         | Primer                                                         | Sequence (5'-3')                                                                                                                      |
|--------------------------------------------------------------------------------------|----------------------------------------------------------------|---------------------------------------------------------------------------------------------------------------------------------------|
| Amplify <i>GFP-ePTS1</i> gene from plasmid pYLEX1- <i>GFP-ePTS1</i> , forward primer | <i>Amplify GFP-ePTS1 gene from plasmid pYLEX1-GFP-ePTS1, F</i> | CCACACACATCCACaGGTACCaATGCTTTCACTAC<br>GTCAATCTATAAGATTTTTCAAGCCAGCCACAAG<br>AACTTTGTGTAGCTCTAGATATCTGCTTCAGggtacc<br>atggtgtctaagcag |
| Amplify <i>GFP-ePTS1</i> gene from plasmid pYLEX1- <i>GFP-ePTS1</i> , reverse primer | <i>Amplify GFP-ePTS1 gene from plasmid pYLEX1-GFP-ePTS1, R</i> | ttagtttcgggtcccacgtgTTAGTGGTGGTGGTGGTGGTG                                                                                             |
| Amplify <i>Erg10</i> gene form <i>Y. lipolytica</i> genomic DNA, forward primer      | <i>Erg10-ePTS1-F</i>                                           | actttggtctactcgggtaccAATGGAGCCCGTCTACATTGTT                                                                                           |
| Amplify <i>Erg10</i> gene form <i>Y. lipolytica</i> genomic DNA, reverse primer      | <i>Erg10-ePTS1-R</i>                                           | GGGACAGGCCATGGAGctacagcttgatcgctcctcgccca<br>gacacttctcaacaatgatag                                                                    |
| Amplify <i>HMGR</i> gene form <i>Y. lipolytica</i> genomic DNA, forward primer       | <i>HMGR-ePTS1-F</i>                                            | acaaccacacacatccacAATGCTACAAGCAGCTATTGGAA<br>A                                                                                        |
| Amplify <i>HMGR</i> gene form <i>Y. lipolytica</i> genomic DNA, reverse primer       | <i>HMGR-ePTS1-R</i>                                            | TTAGTTTCGGGTTCCCACctacagcttgatcgctcctcgccc<br>agtgaccgtatgcaaatatcgc                                                                  |
| Amplify <i>Erg13</i> gene form <i>Y. lipolytica</i> genomic DNA, forward primer      | <i>Erg13-ePTS1-F</i>                                           | acaaccacacacatccacgtgAATGTCGCAACCCGAGAACG                                                                                             |
| Amplify <i>Erg13</i> gene form <i>Y. lipolytica</i> genomic DNA, reverse primer      | <i>Erg13-ePTS1-R</i>                                           | TTAGTTTCGGGTTCCgtgctacagcttgatcgctcctcgccca<br>gctgcttgatctcgtactttc                                                                  |
| Amplify <i>Erg12</i> gene form <i>Y. lipolytica</i> genomic DNA, forward primer      | <i>Erg12-ePTS1-F</i>                                           | ggaaccgaaactaaggatcAATGGACTACATCATTTTCGGC<br>G                                                                                        |
| Amplify <i>Erg12</i> gene form <i>Y. lipolytica</i> genomic DNA, reverse primer      | <i>Erg12-ePTS1-R</i>                                           | ACAAGTTCCGTAGTTGctacagcttgatcgctcctcgcccag<br>atgggtccagggaccgat                                                                      |
| Amplify <i>IDI</i> gene form <i>Y. lipolytica</i> genomic DNA, forward primer        | <i>IDI-ePTS1-F</i>                                             | actttggtctactccgAATGCTACTTGATCCACCGCC                                                                                                 |
| Amplify <i>IDI</i> gene form <i>Y. lipolytica</i> genomic DNA, reverse primer        | <i>IDI-ePTS1-R</i>                                             | GGGACAGGCCATGGAGGTACCTAcagcttgatcgctcctc<br>tcggcccagatgacgacgtcttacgc                                                                |
| Amplify <i>α-Bis</i> gene from plasmid                                               | <i>α-bisabolene-F</i>                                          | cgcatagttaagccagtaGGGAGCTGCATGTGTTCAGAGG                                                                                              |

---

|                                                                                 |                                               |                                                                          |
|---------------------------------------------------------------------------------|-----------------------------------------------|--------------------------------------------------------------------------|
| pYLEX1- $\alpha$ -Bis, forward primer                                           |                                               |                                                                          |
| Amplify $\alpha$ -Bis gene from plasmid pYLEX1- $\alpha$ -Bis, reverse primer   | <i><math>\alpha</math>-bisabolene-R</i>       | tagcgatagcggagtgaCGCGCCGCATAGGCCAG                                       |
| Amplify $\alpha$ -Bis gene from plasmid pYLEX1- $\alpha$ -Bis, forward primer   | <i><math>\alpha</math>-bisabolene-ePTS1-F</i> | acaaccacacacatccacgtgAATGGCCGGTGTCTCTGCC                                 |
| Amplify $\alpha$ -Bis gene from plasmid pYLEX1- $\alpha$ -Bis, reverse primer   | <i><math>\alpha</math>-bisabolene-ePTS1-R</i> | TTAGTTTCGGGTTCCCACTTAcagcttgatcgtcgtcctcgcc<br>ccagGTGGTGATGGTGGTGGTGGAG |
| Amplify <i>Erg19</i> gene form <i>Y. lipolytica</i> genomic DNA, forward primer | <i>Erg19-ePTS1-F</i>                          | acaaccacacacatccacgtgAATGATCCACCAGGCCTCCA                                |
| Amplify <i>Erg19</i> gene form <i>Y. lipolytica</i> genomic DNA, reverse primer | <i>Erg19-ePTS1-R</i>                          | TTAGTTTCGGGTTCCgtgctacagcttgatcgtcgtcctcgccca<br>gcttgcgttcttcagagaac    |
| Amplify <i>Erg20</i> gene form <i>Y. lipolytica</i> genomic DNA, forward primer | <i>Erg20-ePTS1-F</i>                          | acaaccacacacatccacgtgAATGTCCAAGGCGAAATTCG                                |
| Amplify <i>Erg20</i> gene form <i>Y. lipolytica</i> genomic DNA, reverse primer | <i>Erg20-ePTS1-R</i>                          | TTAGTTTCGGGTTCCgtgctacagcttgatcgtcgtcctcgccca<br>gcttctgcgttgaatct       |
| Amplify <i>Erg8</i> gene form <i>Y. lipolytica</i> genomic DNA, forward primer  | <i>Erg8-ePTS1-F</i>                           | acaaccacacacatccacgtgAATGCTACTTGAACCCCTTCT<br>CG                         |
| Amplify <i>Erg8</i> gene form <i>Y. lipolytica</i> genomic DNA, reverse primer  | <i>Erg8-ePTS1-R</i>                           | TTAGTTTCGGGTTCCgtgCTAcagcttgatcgtcgtcctcgccca<br>agatgaccacctattcgctcc   |
| Amplify <i>POX2</i> gene form <i>Y. lipolytica</i> genomic DNA, forward primer  | <i>POX2-F</i>                                 | acaaccacacacatccacAATGAACCCCAACAACACTGGC                                 |
| Amplify <i>POX2</i> gene form <i>Y. lipolytica</i> genomic DNA, reverse primer  | <i>POX2-R</i>                                 | ttagtttcgggtcccacgtgCTATTCCTCATCAAGCTCGCAA                               |
| Amplify <i>MFE1</i> gene form <i>Y. lipolytica</i> genomic DNA, forward primer  | <i>MFE1-F</i>                                 | actttggtactccggtacAATGTCTGGAGA ACTAAGATAC<br>GACGG                       |
| Amplify <i>MFE1</i> gene form <i>Y. lipolytica</i> genomic DNA, reverse primer  | <i>MFE1-R</i>                                 | gggacaggccatggaggtaccTTAGAGCTTAGCATCCTTGGG<br>G                          |
| Amplify <i>POT1</i> gene form <i>Y. lipolytica</i> genomic DNA, forward primer  | <i>POT1-F</i>                                 | actttggtactccggtacATGGAGCCCGTCTACATTGTTT                                 |
| Amplify <i>POT1</i> gene form <i>Y. lipolytica</i> genomic DNA, reverse primer  | <i>POT1-R</i>                                 | gggacaggccatggaggtaccCTAACACTTCTCAACAATGAT<br>AGAGGAA                    |
| Amplify <i>ANTI</i> gene form <i>Y. lipolytica</i>                              | <i>ANTI-F</i>                                 | actttggtactccgAATGGCAGCTATTTCCAAAGACTAT                                  |

---

---

|                                                                                   |                   |                                                     |
|-----------------------------------------------------------------------------------|-------------------|-----------------------------------------------------|
| genomic DNA, forward primer                                                       |                   | G                                                   |
| Amplify <i>ANT1</i> gene form <i>Y. lipolytica</i><br>genomic DNA, reverse primer | <i>ANT1-R</i>     | gggacaggccatggaggtacTTATCCCTTGATCAAGGTGGG<br>G      |
| Amplify the gene expression cassette,<br>forward primer                           | <i>PshAI-F</i>    | agtcataagtgcggcgacgaGAGGCCGTTGAGCACCGC              |
| Amplify the gene expression cassette,<br>reverse primer                           | <i>PshA I-R</i>   | gtgggcgcggggcatgactaGATAAGCTGTCAAACATGAGA<br>ATTTCG |
| Amplify the gene expression cassette,<br>forward primer                           | <i>FspA I-F</i>   | gacaggagcacgatcatcgAGGCCGTTGAGCACCGC                |
| Amplify the gene expression cassette,<br>reverse primer                           | <i>FspA I-R</i>   | gggtcctggccacgggtcgcATAAGCTGTCAAACATGAGAA<br>TTCG   |
| Amplify the gene expression cassette,<br>forward primer                           | <i>BsaWI-F</i>    | atcctgcgatgcagatccggaGAGGCCGTTGAGCACCGC             |
| Amplify the gene expression cassette,<br>reverse primer                           | <i>BsaWI-R</i>    | cctgcaccattatgttccggGATAAGCTGTCAAACATGAGAA<br>TTCG  |
| Amplify the gene expression cassette,<br>forward primer                           | <i>Nru I-F</i>    | ccatccagcctcgcgtcgcgaGAGGCCGTTGAGCACCGC             |
| Amplify the gene expression cassette,<br>reverse primer                           | <i>Nru I-R</i>    | acgtcttgctggcgttcgGATAAGCTGTCAAACATGAGAAT<br>TCG    |
| Amplify the gene expression cassette,<br>forward primer                           | <i>Sal I-F</i>    | ctctcaaggcctcggtcgacGAGGCCGTTGAGCACCGC              |
| Amplify the gene expression cassette,<br>reverse primer                           | <i>Sal I-R</i>    | cgcataagggagagcgtcgaGATAAGCTGTCAAACATGAGA<br>ATTTCG |
| Amplify the gene expression cassette,<br>forward primer                           | <i>EcoNI-F</i>    | ctcccttatgcgactcctgcaGAGGCCGTTGAGCACCGC             |
| Amplify the gene expression cassette,<br>reverse primer                           | <i>EcoNI-R</i>    | actactgggctgcttctaaGATAAGCTGTCAAACATGAGAA<br>TTCG   |
| Amplify the gene expression cassette,<br>forward primer                           | <i>BstZ17 I-F</i> | cgcatagtaagccagtaGAGGCCGTTGAGCACCGC                 |
| Amplify the gene expression cassette,<br>reverse primer                           | <i>BstZ17 I-R</i> | tagcgatagcggagtgaGATAAGCTGTCAAACATGAGAAT<br>TCG     |

---

---

|                                                         |                                                                  |                                                   |
|---------------------------------------------------------|------------------------------------------------------------------|---------------------------------------------------|
| Amplify the gene expression cassette,<br>forward primer | <i>Spe I-F</i>                                                   | cgaggcagcagatccactagGAGGCCGTTGAGCACCGC            |
| Amplify the gene expression cassette,<br>reverse primer | <i>Spe I-R</i>                                                   | gggccgcataggccaGATAAGCTGTCAAACATGAGAAT<br>TCG     |
| Amplify the gene expression cassette,<br>forward primer | <i>Not I-F</i>                                                   | cgcatagttaagccagtaGAGGCCGTTGAGCACCGC              |
| Amplify the gene expression cassette,<br>reverse primer | <i>Not I-F</i>                                                   | tagcgatagcggagtgtgGATAAGCTGTCAAACATGAGAAT<br>TCG  |
| Amplify the gene expression cassette,<br>forward primer | <i>Aan I-F</i>                                                   | taatgaaatgatgatttaGAGGCCGTTGAGCACCGC              |
| Amplify the gene expression cassette,<br>reverse primer | <i>Aan I-R</i>                                                   | gggacaggccatggaggtacTTATCCCTTGATCAAGGTGGG<br>G    |
| Amplify the gene expression cassette,<br>forward primer | <i>FspA I-IDI-F</i>                                              | gacaggagcacgatcatcgAGGCCGTTGAGCACCGC              |
| Amplify the gene expression cassette,<br>reverse primer | <i>FspA I-IDI-R</i>                                              | gggtcctggccacgggtgcgATAAGCTGTCAAACATGAGAA<br>TTCG |
| Amplify the gene expression cassette,<br>forward primer | <i>Nru I-Erg20-F</i>                                             | ccatccagcctcgcgtcggaGAGGCCGTTGAGCACCGC            |
| Amplify the gene expression cassette,<br>reverse primer | <i>Nru I-Erg20-R</i>                                             | acgtcttgctggcgttcgGATAAGCTGTCAAACATGAGAAT<br>TCG  |
| Amplify the gene expression cassette,<br>forward primer | <i>EcoN I-ABC-G1-<br/>ePTS1-F</i>                                | ctcccttatgcgactcctgcaGAGGCCGTTGAGCACCGC           |
| Amplify the gene expression cassette,<br>reverse primer | <i>EcoN I-ABC-G1-<br/>ePTS1-R</i>                                | actactgggctgcttctaaGATAAGCTGTCAAACATGAGAA<br>TTCG |
| Amplify the gene expression cassette,<br>forward primer | <i>BstZ17 I-<math>\alpha</math>-<br/>bisabolene-ePTS1-<br/>F</i> | cgcatagttaagccagtaGAGGCCGTTGAGCACCGC              |
| Amplify the gene expression cassette,<br>reverse primer | <i>BstZ17 I-<math>\alpha</math>-<br/>bisabolene-ePTS1-<br/>R</i> | tagcgatagcggagtgtgGATAAGCTGTCAAACATGAGAAT<br>TCG  |
| Amplify the gene expression cassette,<br>forward primer | <i>FspA I-MFE1-F</i>                                             | gacaggagcacgatcatcgAGGCCGTTGAGCACCGC              |

---

---

|                                                         |                      |                                                    |
|---------------------------------------------------------|----------------------|----------------------------------------------------|
| Amplify the gene expression cassette,<br>reverse primer | <i>FspA I-MFE1-R</i> | gggtcctggccacgggtcgcATAAGCTGTCAAACATGAGAA<br>TTCG  |
| Amplify the gene expression cassette,<br>forward primer | <i>Sal I-POT1-F</i>  | ctctcaagggcatcggGAGGCCGTTGAGCACCGC                 |
| Amplify the gene expression cassette,<br>reverse primer | <i>Sal I-POT1-R</i>  | cgcataagggagagcgtcgaGATAAGCTGTCAAACATGAGA<br>ATTCG |

---
